# Supplementary material
Source: PubMed Central journal article supplement (PMC5570668)
Supplement: NIHMS879238-supplement-Graphic_Abstract.pdf [file NIHMS879238-supplement-Graphic_Abstract.pdf]

## Exposure

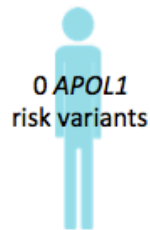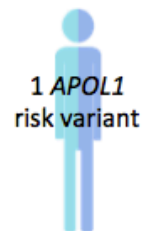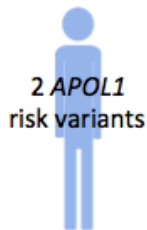

## Hypothesized Mechanisms

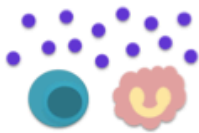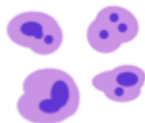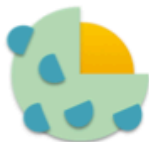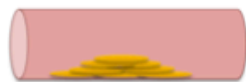

## Outcomes

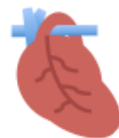

### Composite cardiovascular outcome

- Myocardial infarction or cardiac revascularization procedure
- Heart failure
- Stroke
- Cardiovascular death

---> No association  
---> Association
